# Supplementary material for: Coupling of Thiazole-2-Amines with Isocyanide Ligands in bis-(Isocyanide) Platinum Complex: A New Type of Reactivity
Source: MDPI journal article supplement (doi:10.3390/inorganics10120221), 2022-11-24
Supplement: s1 [file s1]

Supporting Information

for

**Coupling of Thiazole-2-Amines with Isocyanide Ligands in *bis*-(Isocyanide) Platinum**

**Complex: A New Type of Reactivity**

*Yulia A. Orekhova, Alexander S. Mikherdov, Vitalii V. Suslonov, and Vadim P. Boyarskiy*

**X-ray Diffraction Details**

**Table S1.** Crystal data and structure refinement for **4a**, **4b**, and **5a**

| Identification code                | <b>4a</b> (yug102)                                                               | <b>4b</b> (yug102-2)                                                             | <b>5a</b> (yor019)                                                               |
|------------------------------------|----------------------------------------------------------------------------------|----------------------------------------------------------------------------------|----------------------------------------------------------------------------------|
| Empirical formula                  | C <sub>39</sub> H <sub>38</sub> Cl <sub>2</sub> N <sub>6</sub> Pt <sub>2</sub> S | C <sub>40</sub> H <sub>39</sub> Cl <sub>5</sub> N <sub>6</sub> Pt <sub>2</sub> S | C <sub>41</sub> H <sub>41</sub> Cl <sub>5</sub> N <sub>6</sub> Pt <sub>2</sub> S |
| Formula weight                     | 1083.89                                                                          | 1203.26                                                                          | 1217.29                                                                          |
| Temperature/K                      | 100(2)                                                                           | 100(2)                                                                           | 100(2)                                                                           |
| Crystal system                     | triclinic                                                                        | monoclinic                                                                       | monoclinic                                                                       |
| Space group                        | P-1                                                                              | P2 <sub>1</sub> /c                                                               | P2 <sub>1</sub> /c                                                               |
| a/Å                                | 7.6428(2)                                                                        | 8.13876(12)                                                                      | 14.4775(2)                                                                       |
| b/Å                                | 8.2736(4)                                                                        | 18.8975(3)                                                                       | 18.7218(3)                                                                       |
| c/Å                                | 30.3466(11)                                                                      | 27.7978(4)                                                                       | 15.7573(3)                                                                       |
| α/°                                | 86.354(3)                                                                        | 90                                                                               | 90                                                                               |
| β/°                                | 88.298(3)                                                                        | 96.0606(13)                                                                      | 94.769(2)                                                                        |
| γ/°                                | 84.719(3)                                                                        | 90                                                                               | 90                                                                               |
| Volume/Å <sup>3</sup>              | 1906.35(13)                                                                      | 4251.47(11)                                                                      | 4256.15(12)                                                                      |
| Z                                  | 2                                                                                | 4                                                                                | 4                                                                                |
| ρ <sub>calc</sub> /cm <sup>3</sup> | 1.888                                                                            | 1.880                                                                            | 1.900                                                                            |
| μ/mm <sup>-1</sup>                 | 7.562                                                                            | 6.974                                                                            | 15.763                                                                           |
| F(000)                             | 1040.0                                                                           | 2312.0                                                                           | 2344.0                                                                           |
| Crystal size/mm <sup>3</sup>       | 0.15 × 0.1 × 0.1                                                                 | 0.15 × 0.12 × 0.1                                                                | 0.2 × 0.15 × 0.15                                                                |
| Radiation                          | Mo Kα (λ = 0.71073)                                                              | MoKα (λ = 0.71073)                                                               | CuKα (λ = 1.54184)                                                               |
| 2θ range for data collection/°     | 5.054 to 49.996                                                                  | 5.222 to 54.998                                                                  | 6.126 to 134.996                                                                 |
| Index ranges                       | -9 ≤ h ≤ 9, -8 ≤ k ≤ 9, -36 ≤ l ≤ 31                                             | -10 ≤ h ≤ 10, -24 ≤ k ≤ 24, -36 ≤ l ≤ 36                                         | -17 ≤ h ≤ 17, -22 ≤ k ≤ 21, -18 ≤ l ≤ 18                                         |
| Reflections collected              | 12848                                                                            | 86216                                                                            | 28850                                                                            |
| Independent reflections            | 6675 [R <sub>int</sub> = 0.0338, R <sub>sigma</sub> = 0.0495]                    | 9760 [R <sub>int</sub> = 0.0363, R <sub>sigma</sub> = 0.0188]                    | 7670 [R <sub>int</sub> = 0.0664, R <sub>sigma</sub> = 0.0484]                    |
| Data/restraints/parameters         | 6675/0/459                                                                       | 9760/0/495                                                                       | 7670/0/505                                                                       |
| Goodness-of-fit on F <sup>2</sup>  | 1.135                                                                            | 1.287                                                                            | 1.038                                                                            |

|                                                |                                  |                                  |                                  |
|------------------------------------------------|----------------------------------|----------------------------------|----------------------------------|
| Final R indexes [ $I \geq 2\sigma(I)$ ]        | $R_1 = 0.0337$ , $wR_2 = 0.0619$ | $R_1 = 0.0278$ , $wR_2 = 0.0595$ | $R_1 = 0.0425$ , $wR_2 = 0.1131$ |
| Final R indexes [all data]                     | $R_1 = 0.0416$ , $wR_2 = 0.0643$ | $R_1 = 0.0302$ , $wR_2 = 0.0603$ | $R_1 = 0.0455$ , $wR_2 = 0.1158$ |
| Largest diff. peak/hole / $e \text{ \AA}^{-3}$ | 2.09/-2.28                       | 1.48/-2.02                       | 1.97/-1.97                       |
| Flack parameter                                | n/a                              | n/a                              | n/a                              |
| CCDC number                                    | 2214271                          | 2212279                          | 2212276                          |

**Table S2.** Crystal data and structure refinement for **5b**, **6**, and **7**

|                                               |                                                                     |                                                                       |                                                                       |
|-----------------------------------------------|---------------------------------------------------------------------|-----------------------------------------------------------------------|-----------------------------------------------------------------------|
| Identification code                           | <b>5b</b> (yor21)                                                   | <b>6</b> (asm232)                                                     | <b>7</b> (yor024)                                                     |
| Empirical formula                             | $C_{41}H_{41}Cl_5N_6Pt_2S$                                          | $C_{25}H_{29}Cl_3N_6OPtS_2$                                           | $C_{30}H_{32}Cl_{13}N_6PtS_2$                                         |
| Formula weight                                | 1217.29                                                             | 795.10                                                                | 1196.67                                                               |
| Temperature/K                                 | 100(2)                                                              | 100(2)                                                                | 100.01(10)                                                            |
| Crystal system                                | orthorhombic                                                        | monoclinic                                                            | orthorhombic                                                          |
| Space group                                   | $P2_12_12_1$                                                        | $P2_1/n$                                                              | Pbca                                                                  |
| $a/\text{\AA}$                                | 8.11247(5)                                                          | 11.9674(3)                                                            | 14.2834(3)                                                            |
| $b/\text{\AA}$                                | 20.40385(10)                                                        | 16.2090(5)                                                            | 23.4916(4)                                                            |
| $c/\text{\AA}$                                | 26.31527(14)                                                        | 16.0375(5)                                                            | 26.8793(4)                                                            |
| $\alpha/^\circ$                               | 90                                                                  | 90                                                                    | 90                                                                    |
| $\beta/^\circ$                                | 90                                                                  | 108.421(3)                                                            | 90                                                                    |
| $\gamma/^\circ$                               | 90                                                                  | 90                                                                    | 90                                                                    |
| Volume/ $\text{\AA}^3$                        | 4355.85(4)                                                          | 2951.53(15)                                                           | 9019.1(3)                                                             |
| Z                                             | 4                                                                   | 4                                                                     | 8                                                                     |
| $\rho_{\text{calc}}/\text{g cm}^{-3}$         | 1.856                                                               | 1.789                                                                 | 1.763                                                                 |
| $\mu/\text{mm}^{-1}$                          | 15.402                                                              | 5.198                                                                 | 14.034                                                                |
| $F(000)$                                      | 2344.0                                                              | 1560.0                                                                | 4680.0                                                                |
| Crystal size/ $\text{mm}^3$                   | $0.6 \times 0.5 \times 0.3$                                         | $0.1 \times 0.1 \times 0.1$                                           | $0.12 \times 0.12 \times 0.1$                                         |
| Radiation                                     | $\text{CuK}\alpha$ ( $\lambda = 1.54184$ )                          | $\text{MoK}\alpha$ ( $\lambda = 0.71073$ )                            | $\text{CuK}\alpha$ ( $\lambda = 1.54184$ )                            |
| $2\Theta$ range for data collection/ $^\circ$ | 5.48 to 139.99                                                      | 5.11 to 54.996                                                        | 6.576 to 155.088                                                      |
| Index ranges                                  | $-9 \leq h \leq 9$ , $-24 \leq k \leq 24$ ,<br>$-32 \leq l \leq 32$ | $-15 \leq h \leq 12$ , $-19 \leq k \leq 21$ ,<br>$-20 \leq l \leq 20$ | $-18 \leq h \leq 17$ , $-29 \leq k \leq 29$ ,<br>$-33 \leq l \leq 18$ |
| Reflections collected                         | 110650                                                              | 13267                                                                 | 35479                                                                 |
| Independent reflections                       | 8247 [ $R_{\text{int}} = 0.0653$ ,<br>$R_{\text{sigma}} = 0.0230$ ] | 6781 [ $R_{\text{int}} = 0.0399$ ,<br>$R_{\text{sigma}} = 0.0737$ ]   | 9208 [ $R_{\text{int}} = 0.0641$ ,<br>$R_{\text{sigma}} = 0.0543$ ]   |
| Data/restraints/parameters                    | 8247/0/505                                                          | 6781/0/342                                                            | 9208/0/475                                                            |
| Goodness-of-fit on $F^2$                      | 1.044                                                               | 1.027                                                                 | 1.085                                                                 |
| Final R indexes [ $I \geq 2\sigma(I)$ ]       | $R_1 = 0.0241$ , $wR_2 = 0.0580$                                    | $R_1 = 0.0425$ , $wR_2 = 0.0783$                                      | $R_1 = 0.0441$ , $wR_2 = 0.1161$                                      |

|                                                |                                  |                                  |                                  |
|------------------------------------------------|----------------------------------|----------------------------------|----------------------------------|
| Final R indexes [all data]                     | $R_1 = 0.0248$ , $wR_2 = 0.0584$ | $R_1 = 0.0694$ , $wR_2 = 0.0899$ | $R_1 = 0.0526$ , $wR_2 = 0.1216$ |
| Largest diff. peak/hole / $e \text{ \AA}^{-3}$ | 0.84/-1.17                       | 2.53/-1.12                       | 2.02/-2.02                       |
| Flack parameter                                | -0.034(5)                        | n/a                              | n/a                              |
| CCDC number                                    | 2212278                          | 2212275                          | 2212277                          |

### NMR Spectra

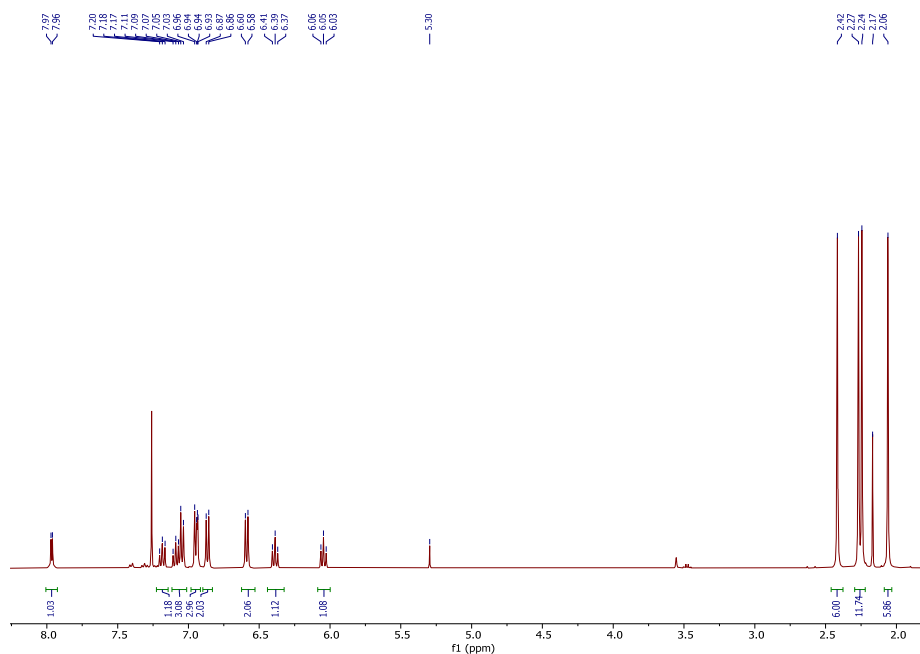

Figure S1. The  $^1\text{H}$  NMR spectrum of **4a** in  $\text{CDCl}_3$ .

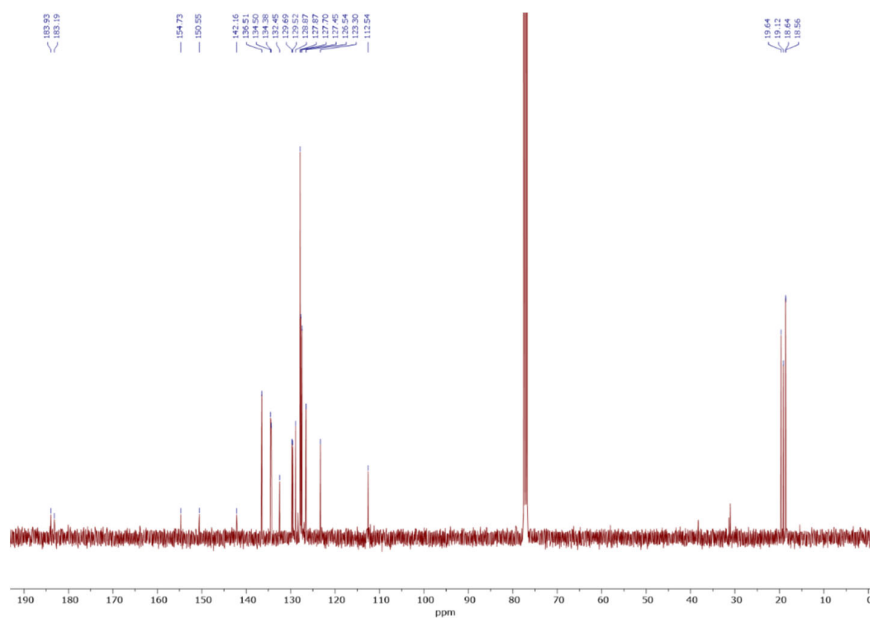

Figure S2. The  $^{13}\text{C}$  NMR spectrum of **4a** in  $\text{CDCl}_3$ .

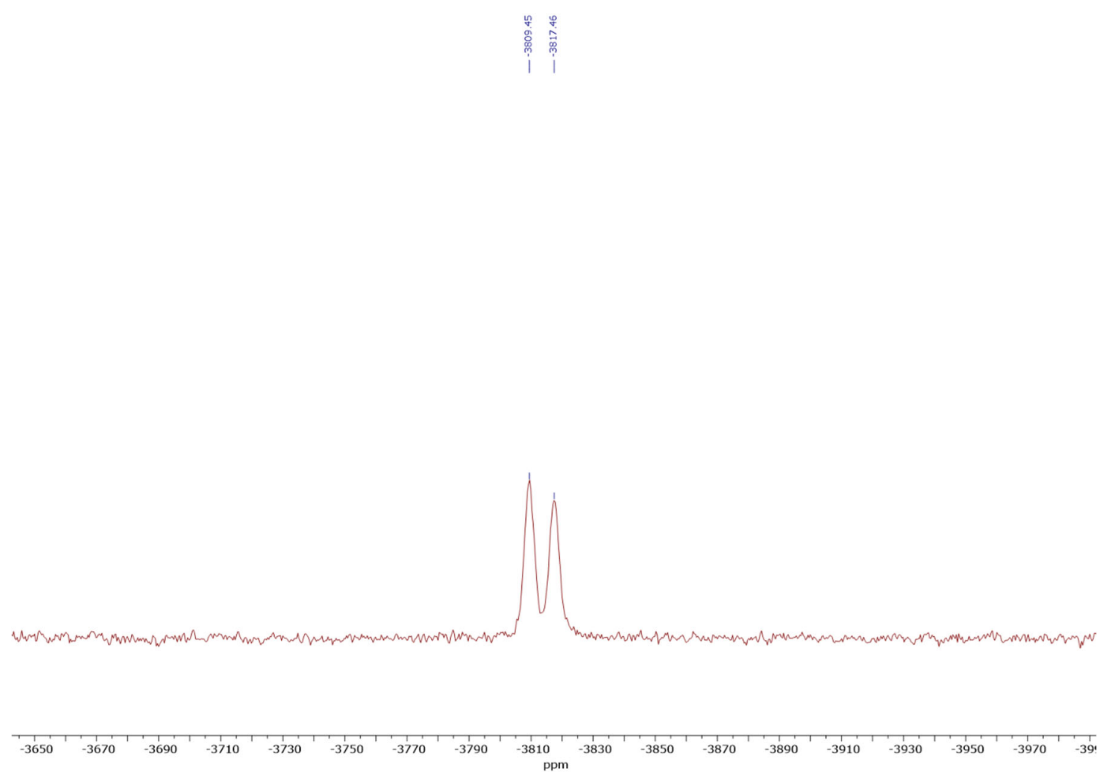

**Figure S3.** The  $^{195}\text{Pt}$  spectrum of **4a** in  $\text{CDCl}_3$ .

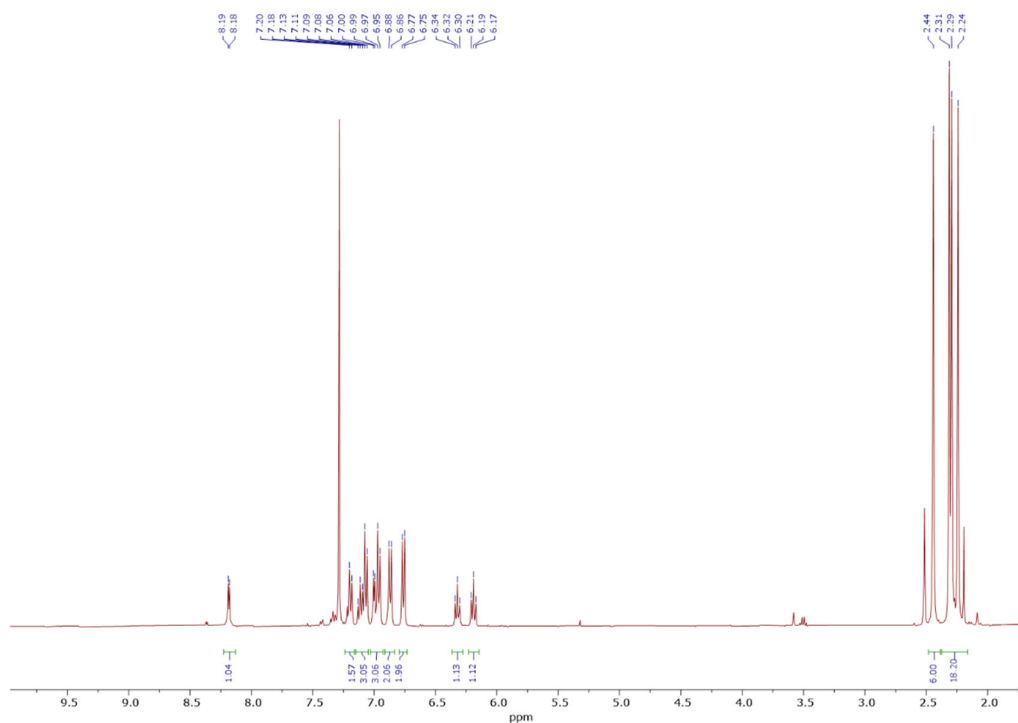

**Figure S4.** The  $^1\text{H}$  NMR spectrum of **4b** in  $\text{CDCl}_3$ .

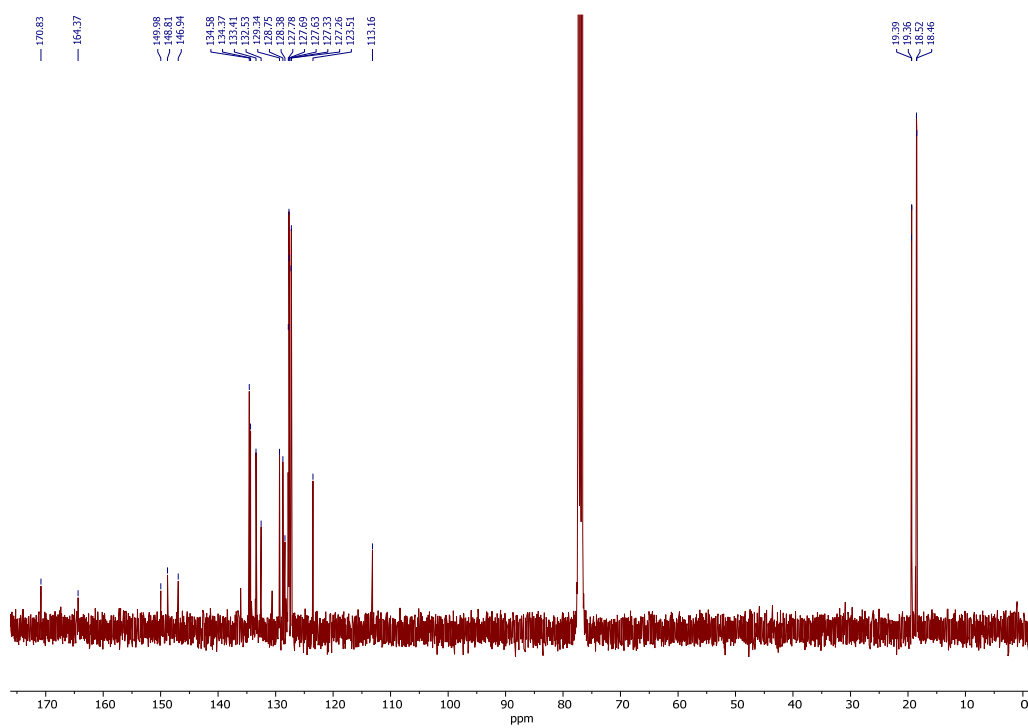

Figure S5. The  $^{13}\text{C}$  NMR spectrum of **4b** in  $\text{CDCl}_3$ .

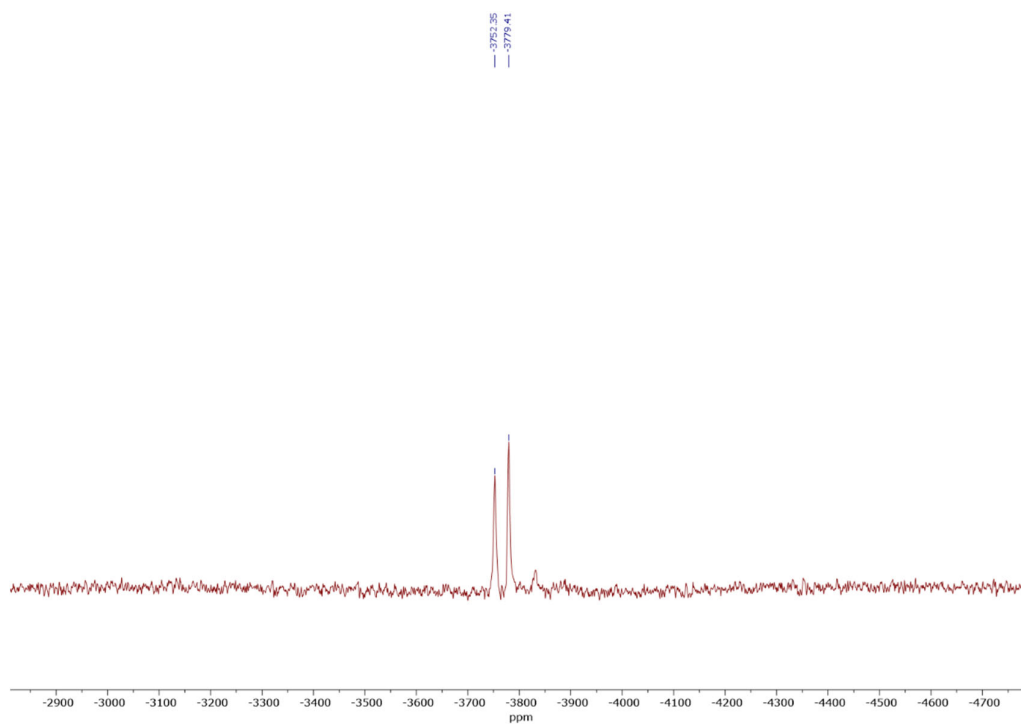

Figure S6. The  $^{195}\text{Pt}$  NMR spectrum of **4b** in  $\text{CDCl}_3$ .

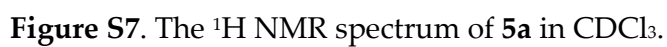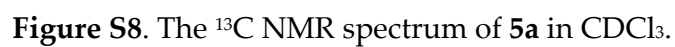

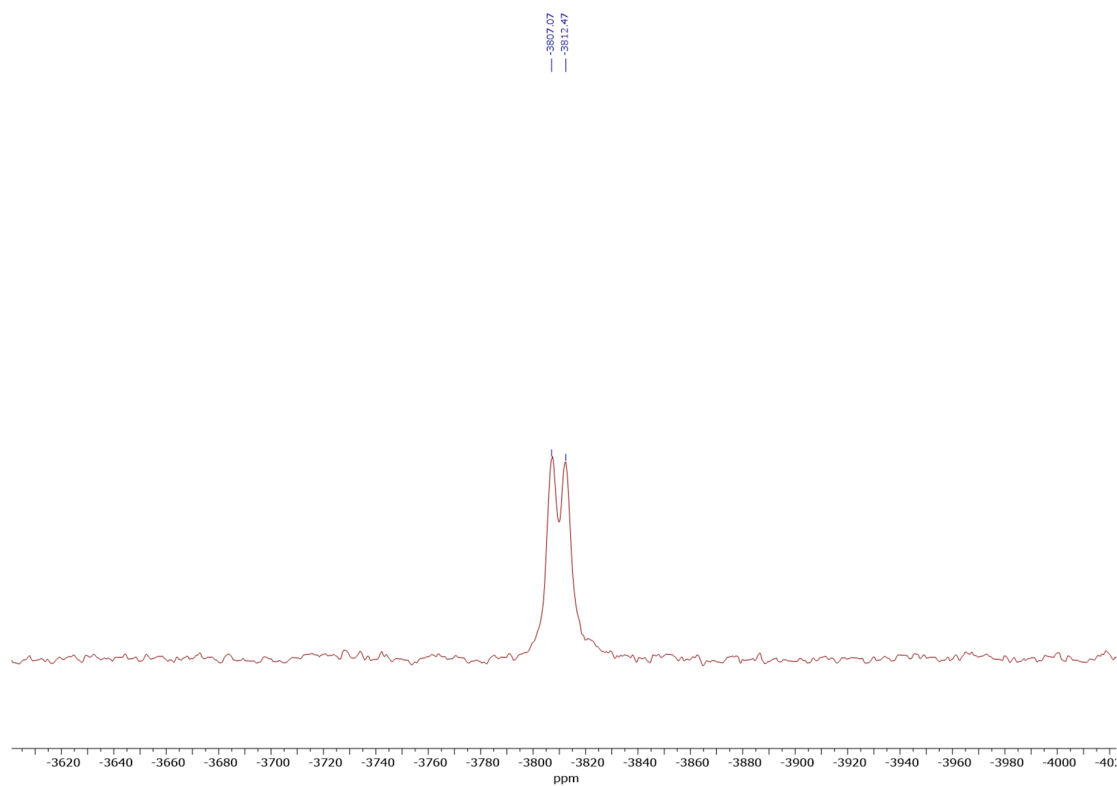

**Figure S9.** The  $^{195}\text{Pt}$  NMR spectrum of **5a** in  $\text{CDCl}_3$ .

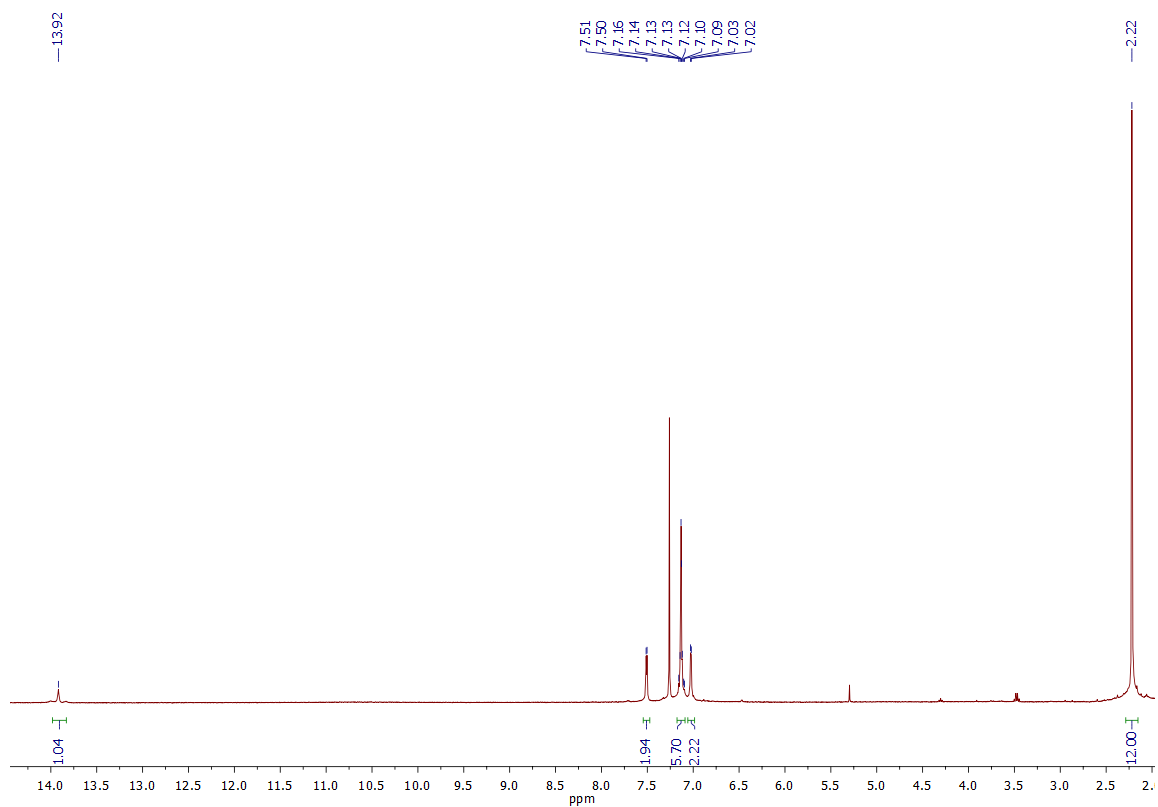

**Figure S10.** The  $^1\text{H}$  NMR spectrum of **6** in  $\text{CDCl}_3$ .

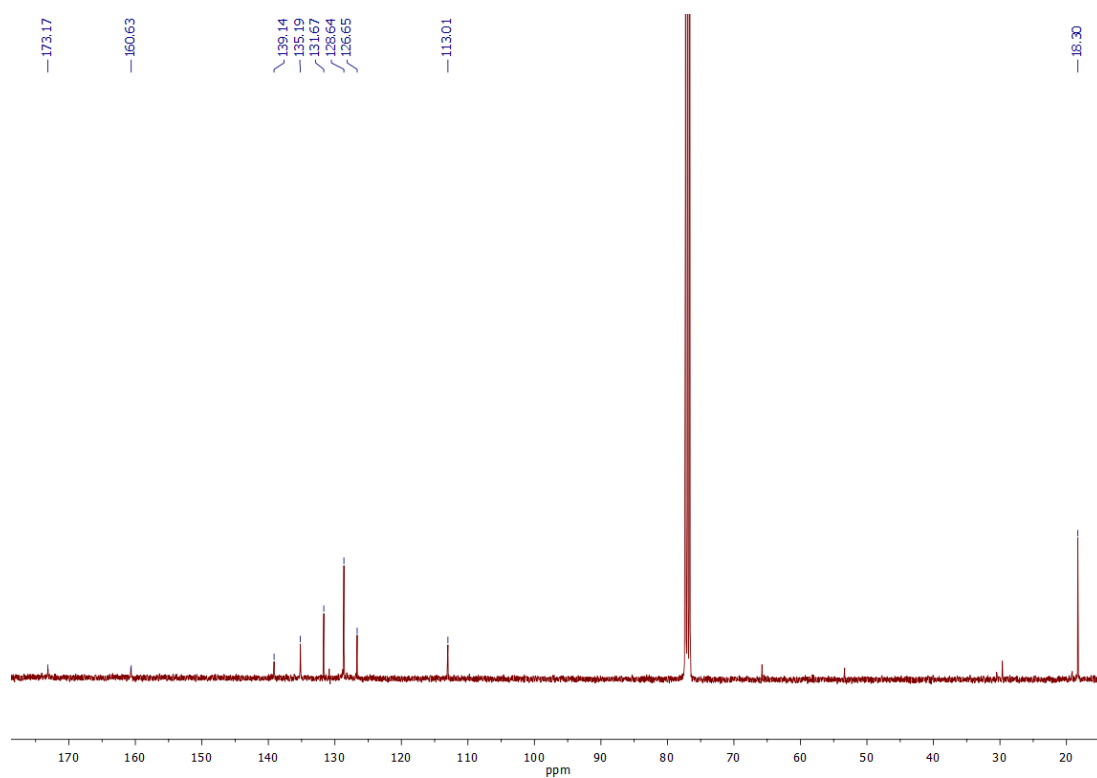

**Figure S11.** The <sup>13</sup>C NMR spectrum of **6** in CDCl<sub>3</sub>.

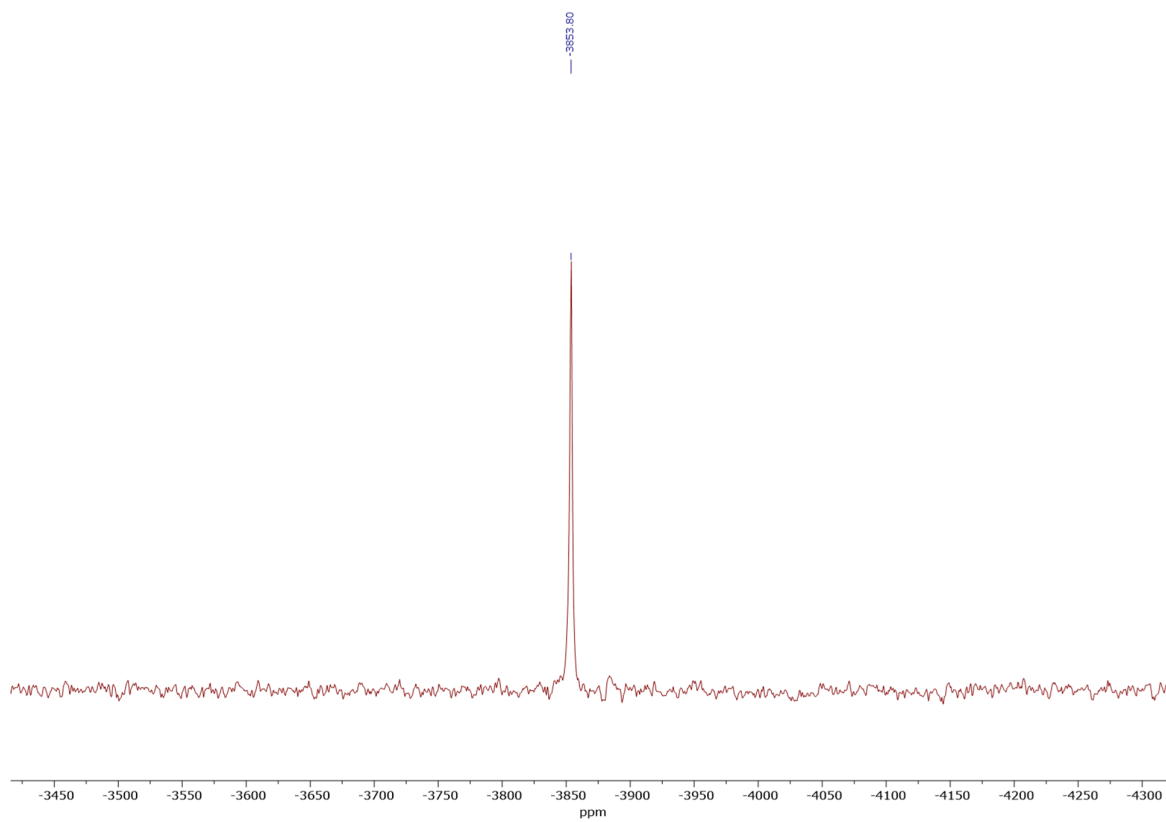

**Figure S12.** The <sup>195</sup>Pt NMR spectrum of **6** in CDCl<sub>3</sub>.



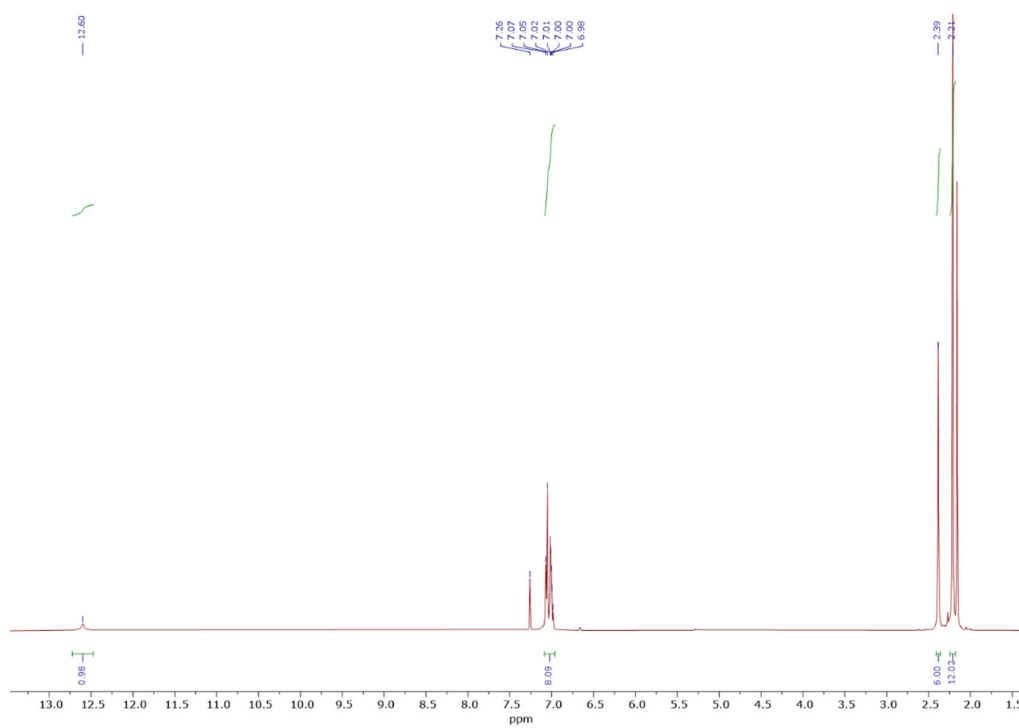

**Figure S13.** The  $^1\text{H}$  NMR spectrum of **7**•Acetone in  $\text{CDCl}_3$ .

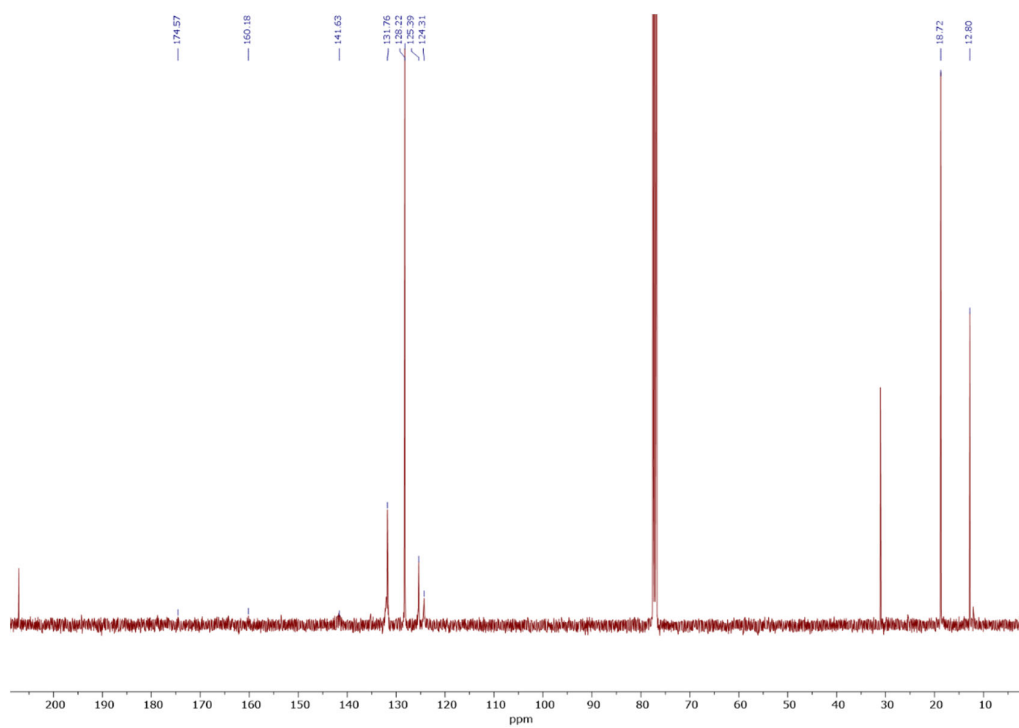

**Figure S14.** The  $^{13}\text{C}$  NMR spectrum of **7**•Acetone in  $\text{CDCl}_3$ .

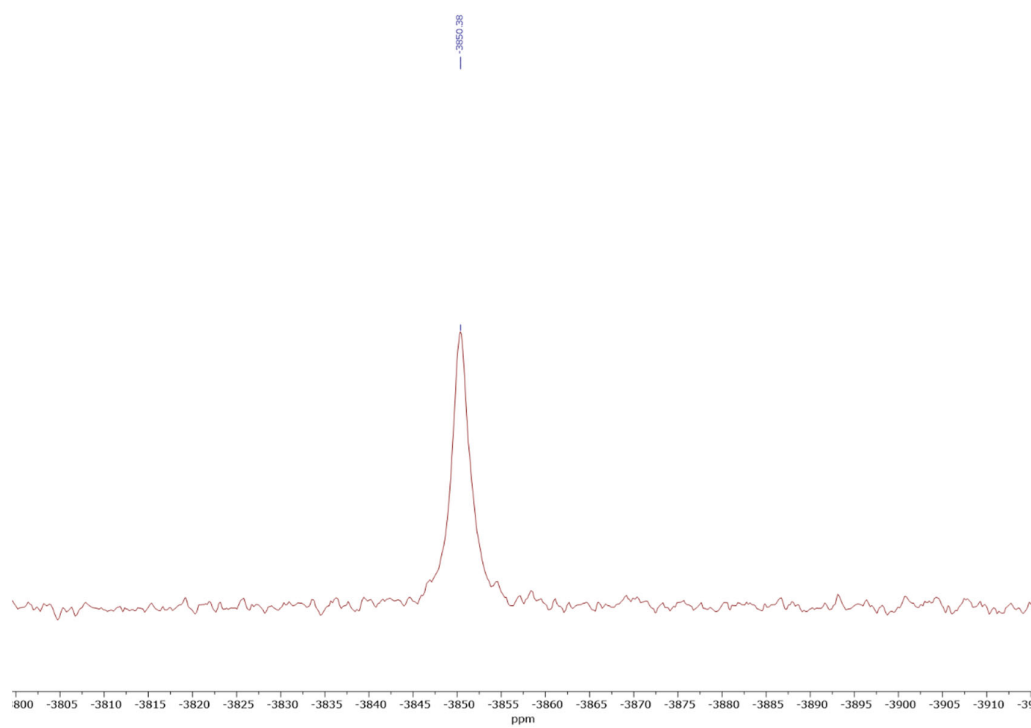

**Figure S15.** The  $^{195}\text{Pt}$  NMR spectrum of **7**•Acetone in  $\text{CDCl}_3$ .
